# Supplementary material
Source: publisher figshare collection journal article supplement (https://acs.figshare.com/ndownloader/files/17874836)
Supplement: Supplementary file 1 [file 17874836]

# Microfluidic-based Immuno-modulation of Immune Cells using Upconversion Nanoparticles in Simulated Blood Vessel-Tumor System

Dulani Chandima Wimalachandra<sup>†#</sup>, Yong Li<sup>†#</sup>, Jinliang Liu<sup>‡</sup>, Swati Shikha<sup>†</sup>, Jing Zhang<sup>‡,\*</sup>, Yaw-Chyn Lim<sup>§,\*</sup>, and Yong Zhang<sup>†,\*</sup>

## Supporting Information

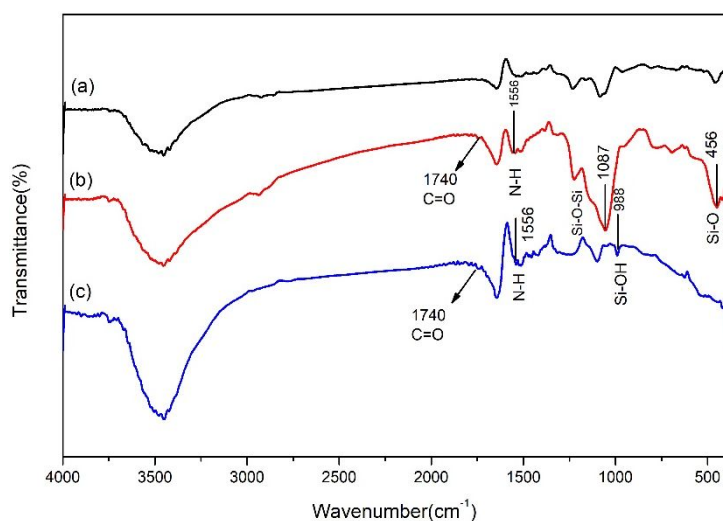

Figure S1. FT-IR spectra of UCNPs@mSiO<sub>2</sub> (a), FA-UCNPs (b), CCL21-FA-UCNPs (c)

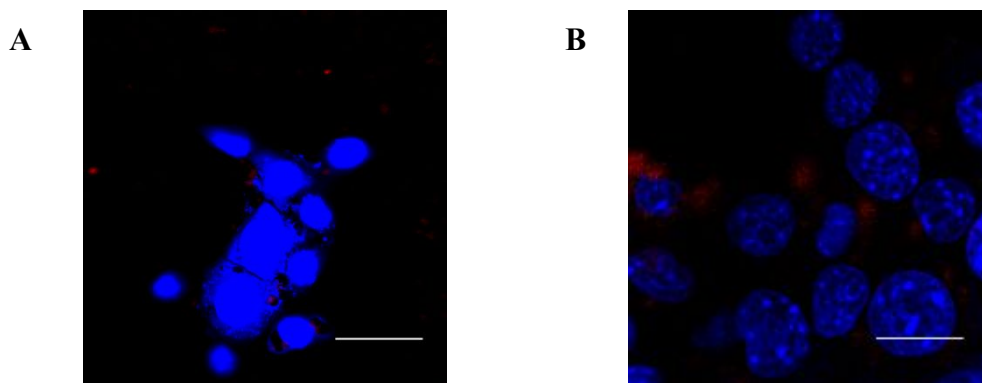

Figure S2. Intracellular uptake of nanoparticles by 4T1 cells. Cellular imaging of upconversion fluorescence emitted by 4T1 cells loaded with 200  $\mu\text{g/mL}$  of

1 UCNPs@mSiO<sub>2</sub> (left) and FA-UCNPs (right) nanoparticles. (A, scale bar = 30 μm; B,  
2 20 μm, right)

3

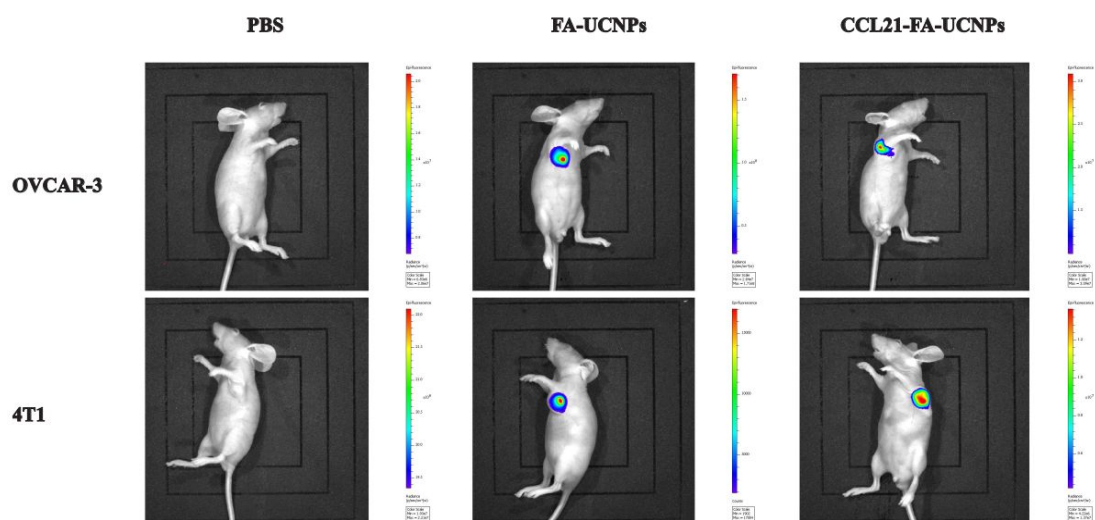

4

5 Figure S3. *In vivo* upconversion luminescence imaging of PBS, FA-UCNPs and  
6 CCL21-UCNPs in OVCAR-3 tumour-bearing mice and 4T1 tumour-bearing mice.
